# Supplementary material for: A combined experimental and DFT study on the catalysis performance of a Co-doped MoS2 monolayer for hydrodesulfurization reaction
Source: Royal Society of Chemistry journal article supplement (doi:10.1039/d1nj05368j), 2022-01-01
Supplement: d1nj05368j1.pdf [file d1nj05368j1.pdf]

## Electronic Supplementary Material

### **A combined experimental and DFT study on catalysis performance of Co-doped MoS<sub>2</sub> monolayer for hydrodesulfurization reaction**

Xinlin Zhang,<sup>a</sup> Yi Zheng,<sup>a</sup> Jiaying Chen,<sup>a</sup> Haowen Xue,<sup>a</sup> Yongjun Liu\*<sup>a</sup>

<sup>a</sup> College of Chemical Engineering, Huaqiao University, Xiamen 361000, PR China

\*Corresponding author: Yongjun Liu

E-mail: yongjunliu@hqu.edu.cn

Tel: +86-13559222170

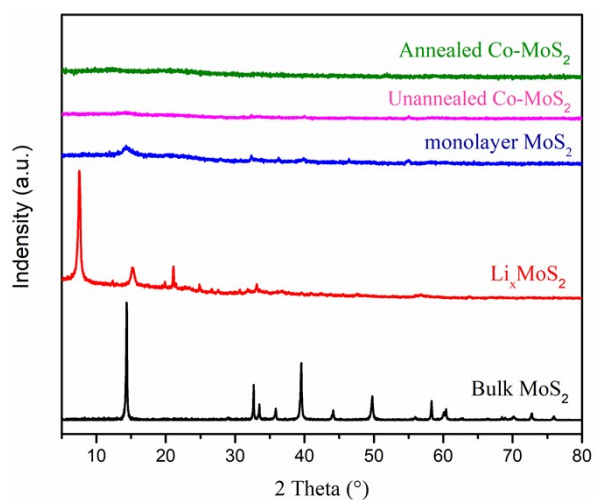

**Fig. S1** X-ray diffractogram of Bulk  $\text{MoS}_2$ ,  $\text{Li}_x\text{MoS}_2$ , monolayer  $\text{MoS}_2$ , Unannealed  $\text{Co-MoS}_2$  and Annealed  $\text{Co-MoS}_2$ .

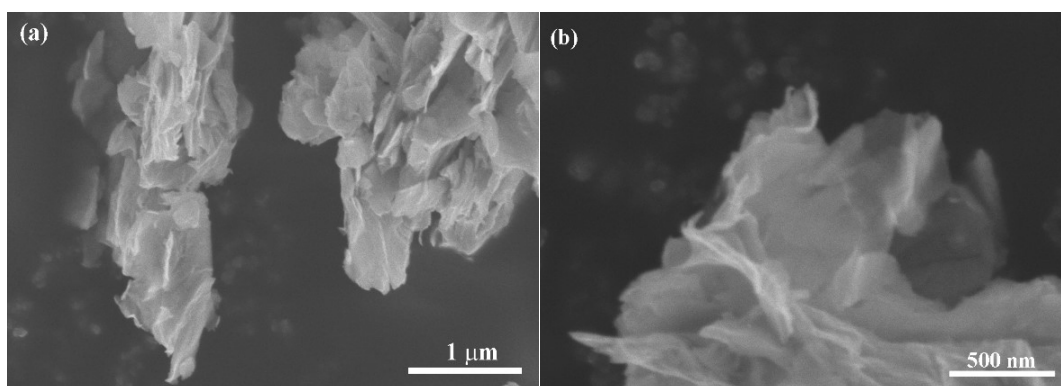

**Fig. S2** SEM images of exfoliated  $\text{MoS}_2$  monolayer without (a) and with (b) Co doping.

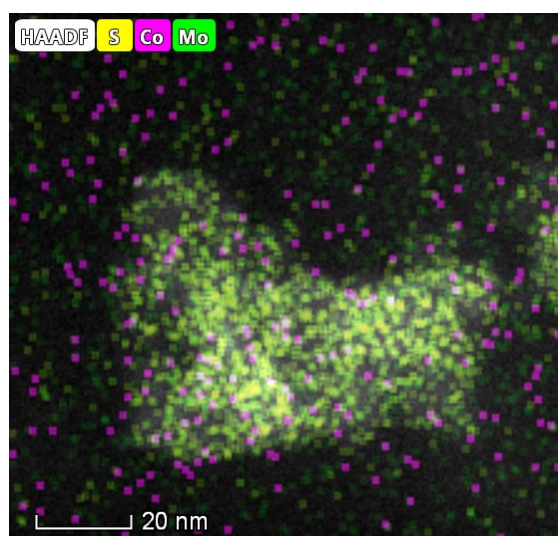

**Fig. S3** HAADF-STEM image of prepared  $\text{Co-MoS}_2$ .

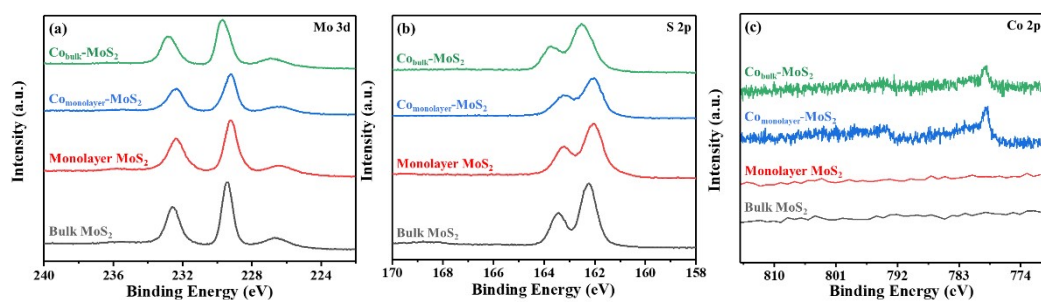

**Fig. S4** XPS spectra of Mo 3d (a), S 2p (b) and Co 2p (c) regions of monolayer MoS<sub>2</sub> and Co-doped monolayer MoS<sub>2</sub>.

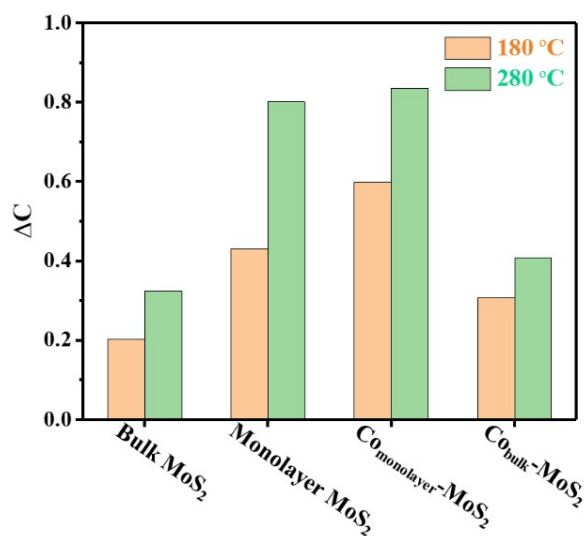

**Fig. S5** Thiophene conversion of varied catalysts after reaction of 8 hours at different temperature.

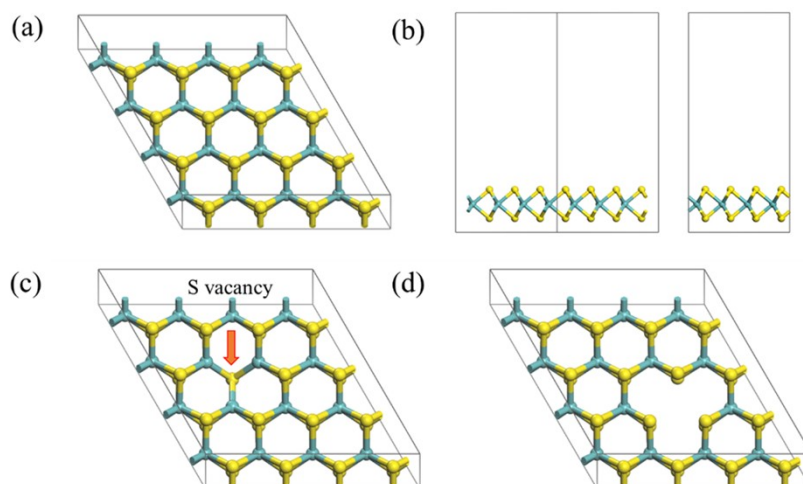

**Fig. S6** Model images of MoS<sub>2</sub> monolayer. (a) MoS<sub>2</sub> monolayer, (b) side view of MoS<sub>2</sub> monolayer, (c) MoS<sub>2</sub> monolayer with S vacancy, (d) MoS<sub>2</sub> monolayer with Mo vacancy. (yellow color: sulfur atoms; blue color: molybdenum atoms)

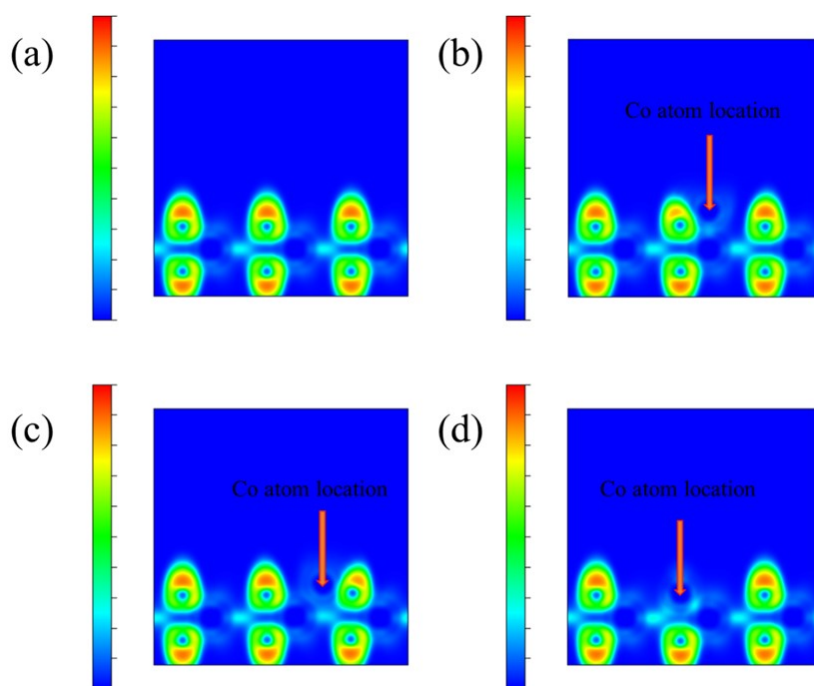

**Fig. S7** Electron localization function of the electron density on the side. (a) MoS<sub>2</sub> single sheet, (b) MoS<sub>2</sub> single sheet with Co on Mo site, (c) MoS<sub>2</sub> single sheet with Co atom in hollow site, (d) MoS<sub>2</sub> single sheet with Co filled in S-vacancy. The coordinate axis ranges from 0 to 1.

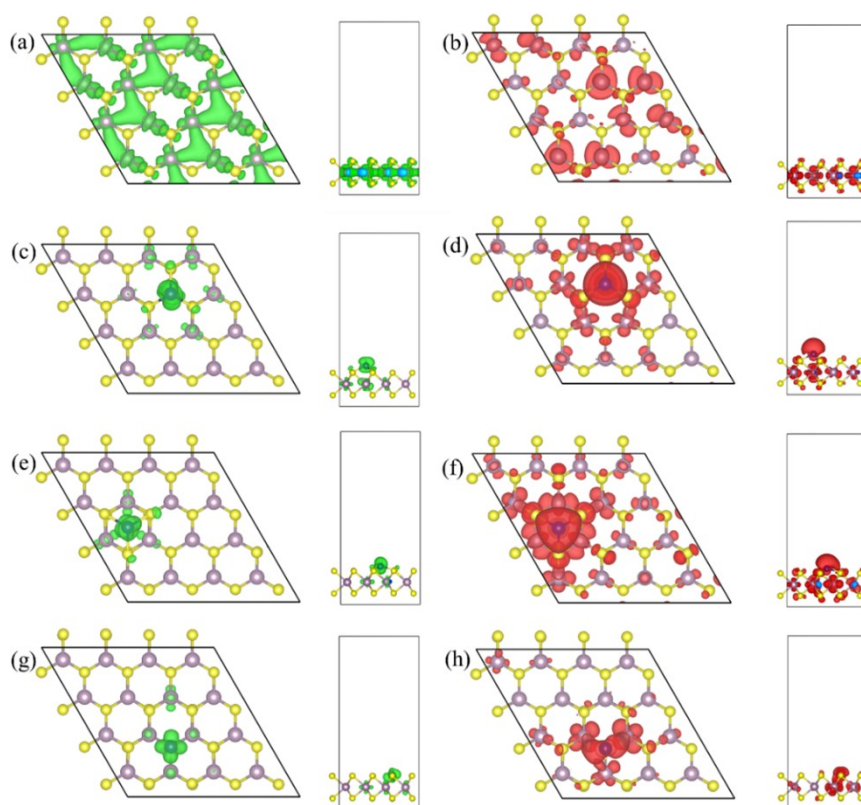

**Fig. S8** The top and side views of the distribution of frontal tracks on the MoS<sub>2</sub> catalyst before and after Co atom doping. (a) VBM orbit of MoS<sub>2</sub>; (b) CBM orbit of MoS<sub>2</sub>; (c) VBM orbit of Co<sub>Mo</sub>-MoS<sub>2</sub>; (d) CBM orbit of Co<sub>Mo</sub>-MoS<sub>2</sub>; (e) VBM orbit of Co<sub>hollow</sub>-MoS<sub>2</sub>; (f) Co<sub>hollow</sub>-MoS<sub>2</sub> CBM track; (g) Co<sub>Vs</sub>-MoS<sub>2</sub> VBM track; (h) Co<sub>Vs</sub>-MoS<sub>2</sub> CBM track.

For the original MoS<sub>2</sub>, the orbits of VBM and CBM are both distributed on the molybdenum atomic layer, which explains that it is generally inert in the catalytic reaction. When Co atoms are doped on the basal surface of the catalyst, these two orbitals are distributed on the Co atoms and the S atom sites around Co center. Therefore, it can be speculated that these sites may be catalytically active centers.

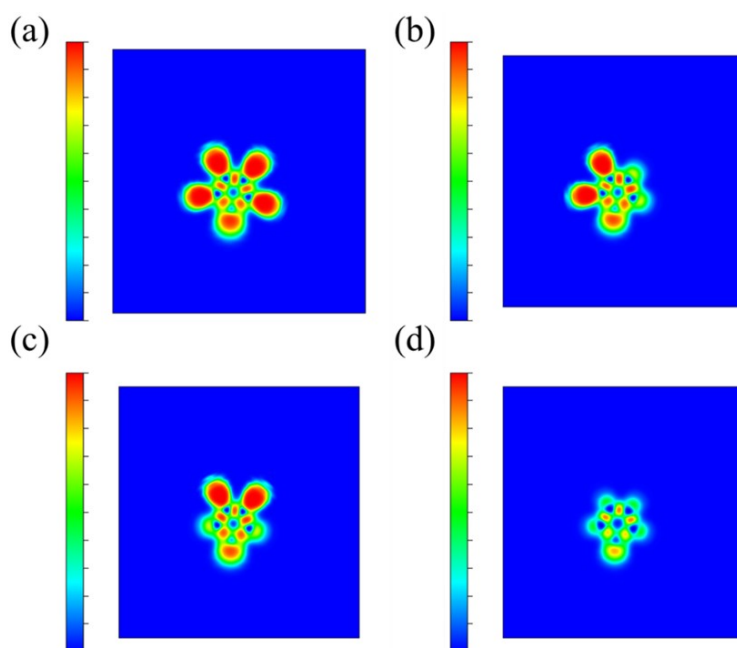

**Fig. S9** ELF charge of thiophene and important intermediates. (a) thiophene, (b) 2,3-DHT, (c) 2,5-DHT, (d) THT. The coordinate axis ranges from 0 to 1.

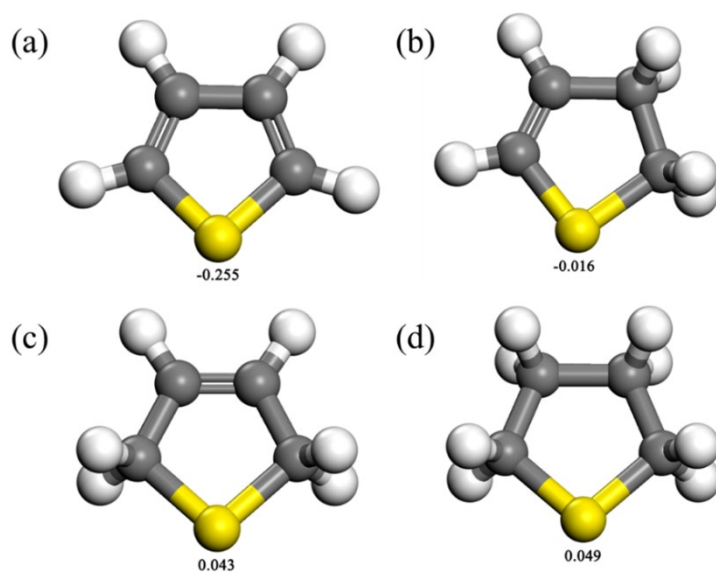

**Fig. S10** Bader charge analysis of S atom at the adsorption site. (a) thiophene, (b) 2,3-DHT, (c) 2,5-DHT, (d) THT. Negative sign means losing electrons, positive sign means gaining electrons.

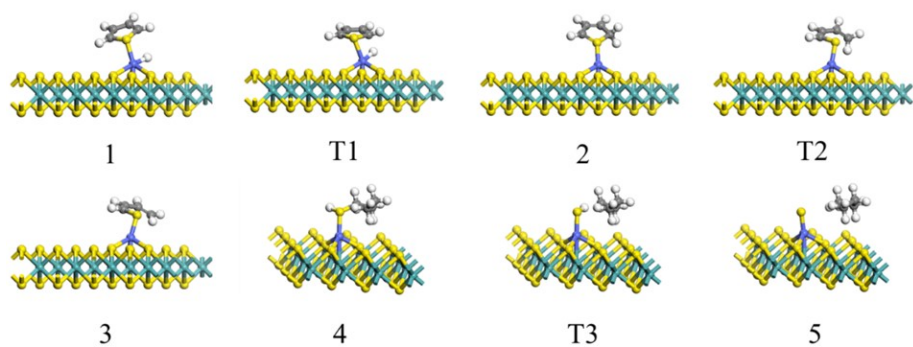

**Fig. S11** Reaction structure models of the DDS pathway of thiophene on  $\text{Co}_{\text{Mo}}\text{-MoS}_2$ .

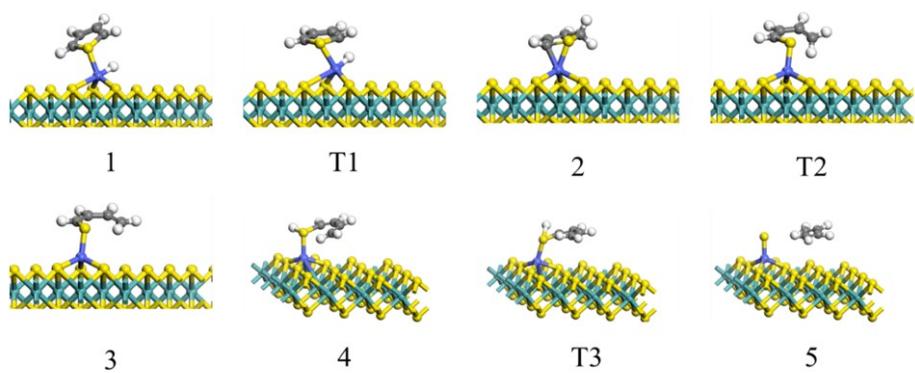

**Fig. S12** Reaction structure models of the DDS pathway of thiophene on  $\text{Co}_{\text{hollow}}\text{-MoS}_2$ .

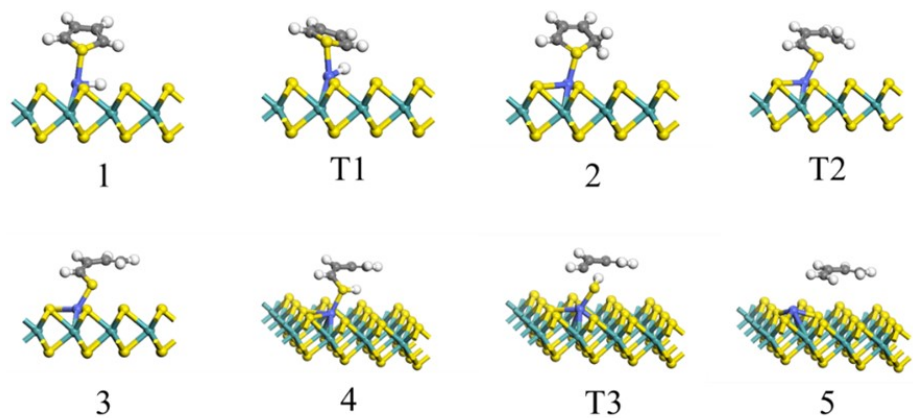

**Fig. S13** Reaction structure models of the DDS pathway of thiophene on  $\text{Co}_{\text{Vs}}\text{-MoS}_2$ .



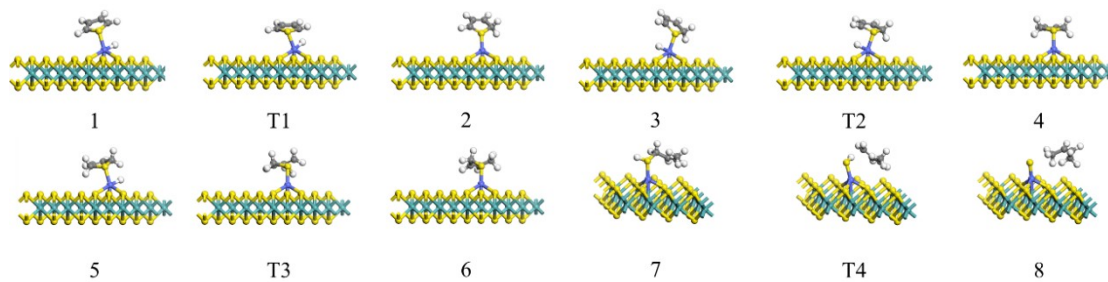

**Fig. S14** Reaction structure models of the first PH pathway of thiophene on  $\text{Co}_{\text{Mo}}$ - $\text{MoS}_2$ .

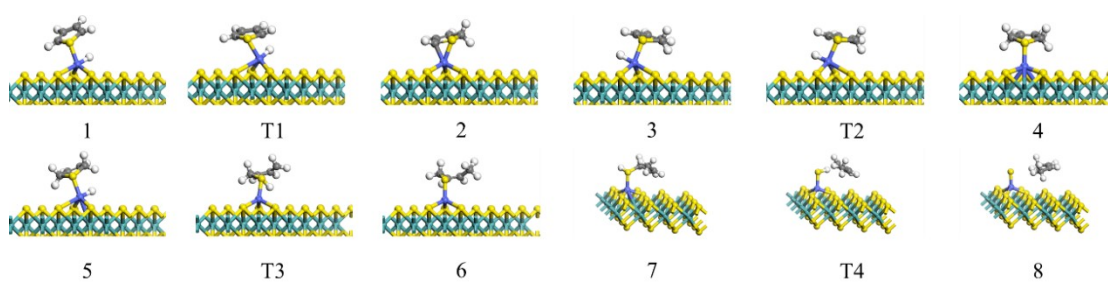

**Fig. S15** Reaction structure models of the first PH pathway of thiophene on  $\text{Co}_{\text{hollow}}$ - $\text{MoS}_2$ .

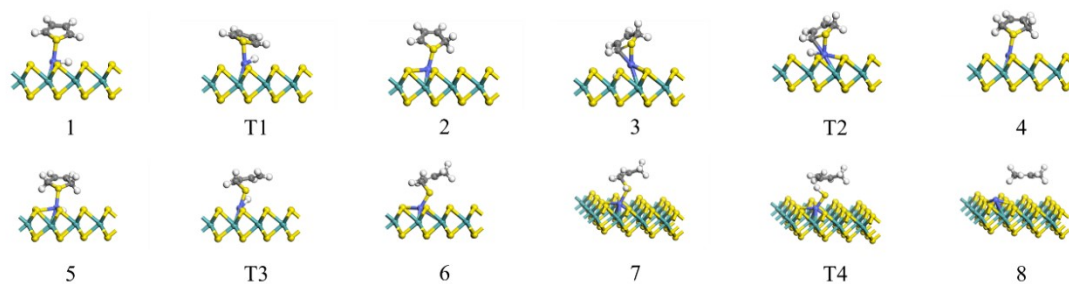

**Fig. S16** Reaction structure models of the first PH pathway of thiophene on  $\text{Co}_{\text{Vs}}$ - $\text{MoS}_2$ .



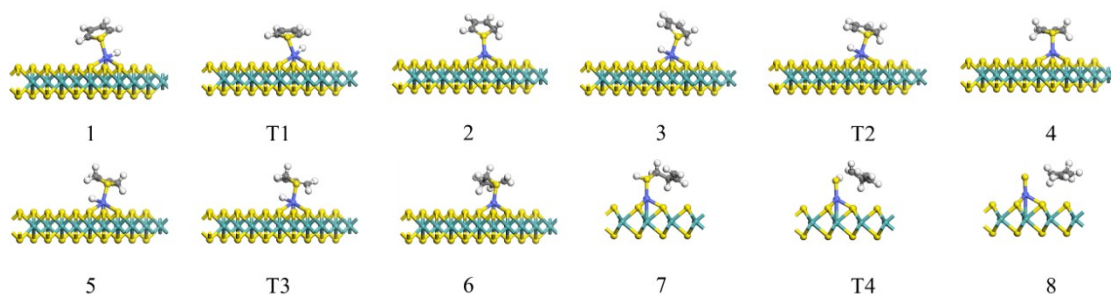

**Fig. S17** Reaction structure models of the second PH pathway of thiophene on  $\text{Co}_{\text{Mo}}$ - $\text{MoS}_2$ .

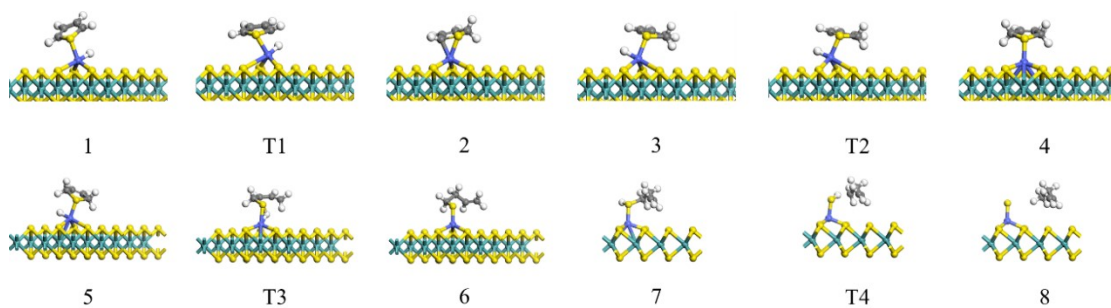

**Fig. S18** Reaction structure models of the second PH pathway of thiophene on  $\text{Co}_{\text{hollow}}$ - $\text{MoS}_2$ .

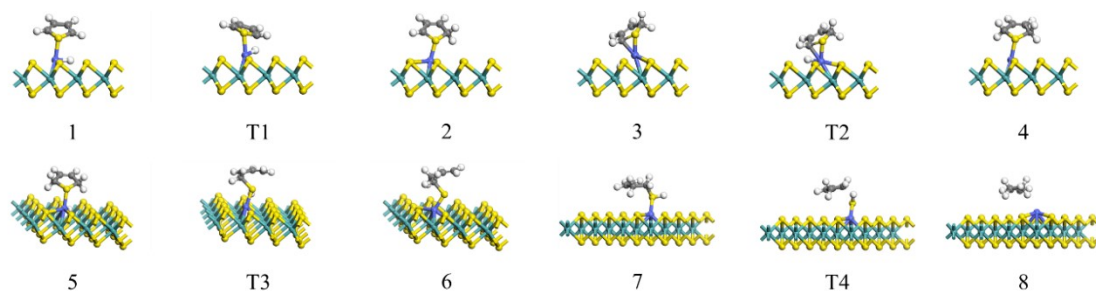

**Fig. S19** Reaction structure models of the second PH pathway of thiophene on  $\text{Co}_{\text{Vs}}$ - $\text{MoS}_2$ .

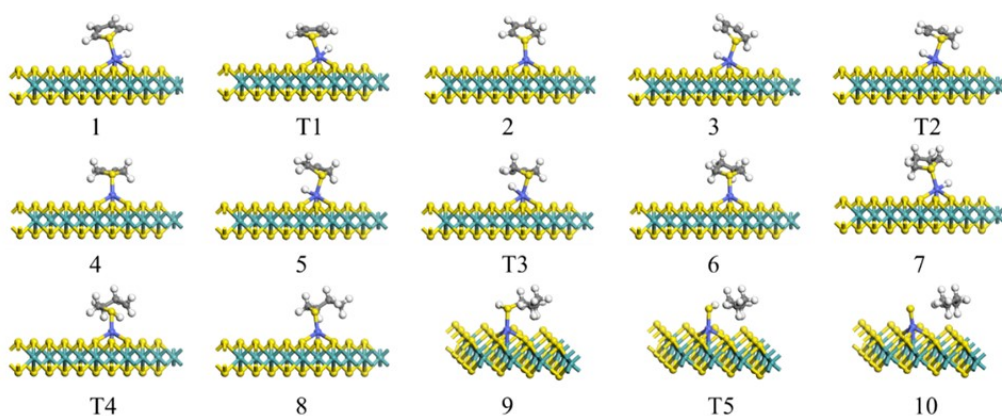

**Fig. S20** Reaction structure models of the FH pathway of thiophene on  $\text{Co}_{\text{Mo}}\text{-MoS}_2$ .

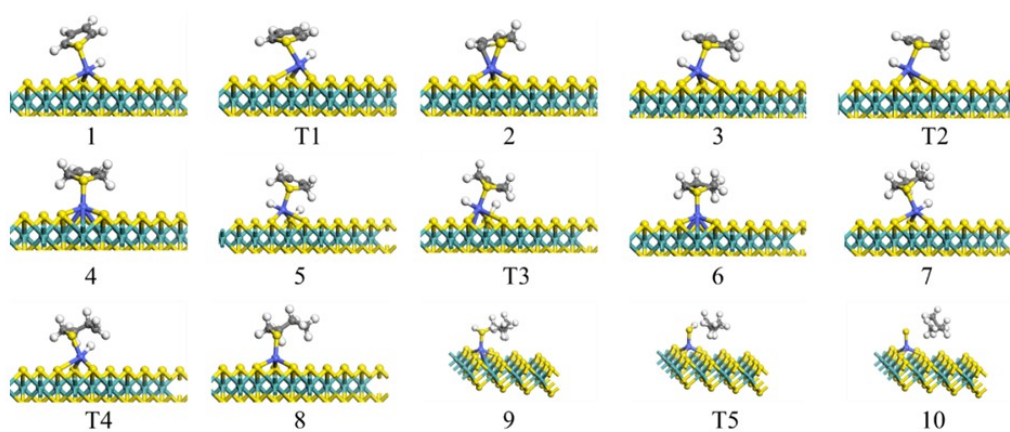

**Fig. S21** Reaction structure models of the FH pathway of thiophene on  $\text{Co}_{\text{hollow}}\text{-MoS}_2$ .

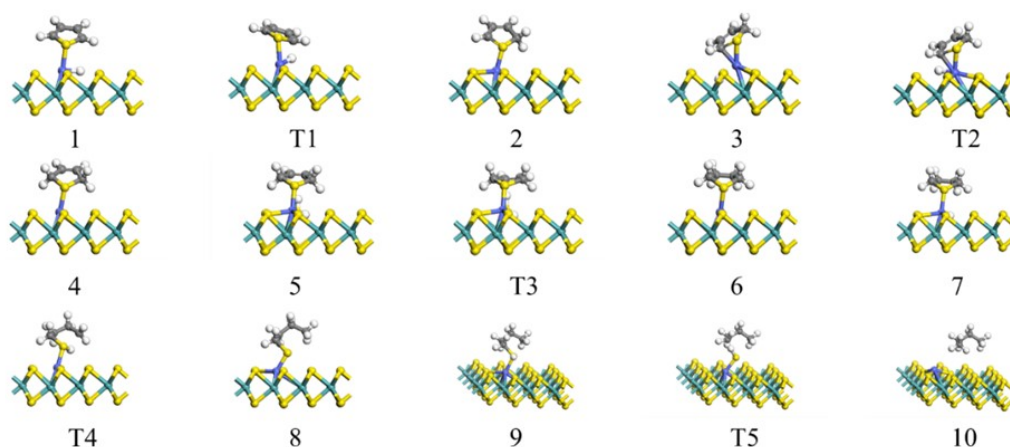

**Fig. S22** Reaction structure models of the FH pathway of thiophene on  $\text{Co}_{\text{Vs}}\text{-MoS}_2$ .

**Table S1** Vacancy formation energy on MoS<sub>2</sub> single sheet

| MoS <sub>2</sub> single sheet      | Energy (eV) | Atomisation Energy (eV) | Bond Energy | Vacancy Formation Energy (eV) |
|------------------------------------|-------------|-------------------------|-------------|-------------------------------|
| MoS <sub>2</sub>                   | -356.64     | -253.96                 | -3.97       |                               |
| MoS <sub>2</sub> with a S-vacancy  | -349.56     | -247.79                 |             | 2.20                          |
| MoS <sub>2</sub> with a Mo-vacancy | -361.51     | -239.97                 |             | 6.05                          |

The calculation of atomization energy, bond energy and vacancy formation energy are referenced from previous study.<sup>1</sup>

**Table S2** Analysis of Co bonding configuration

| MoS <sub>2</sub> single sheet with isolated Co atom | Energy(eV) | Atomisation Energy (eV) | Bonding energy of Co atom (eV) | Vacancy Formation Energy (eV) |
|-----------------------------------------------------|------------|-------------------------|--------------------------------|-------------------------------|
| Co on S site                                        | -360.11    | -255.66                 | -1.26                          |                               |
| Co on Mo site                                       | -361.80    | -257.34                 | -3.38                          |                               |
| Co in hollow site                                   | -361.51    | -257.05                 | -3.10                          |                               |
| Co filled in S-vacancy                              | -355.70    | -252.15                 | -4.36                          | -2.17                         |

**Table S3** Imaginary frequency information of the transition state.

| Pathway               | Location                               | Imaginary frequency/cm <sup>-1</sup> |     |      |      |      |
|-----------------------|----------------------------------------|--------------------------------------|-----|------|------|------|
|                       |                                        | T1                                   | T2  | T3   | T4   | T5   |
| <b>DDS route</b>      | Co <sub>hollow</sub> -MoS <sub>2</sub> | 604                                  | 290 | 1258 |      |      |
|                       | Co <sub>Mo</sub> -MoS <sub>2</sub>     | 595                                  | 295 | 1235 |      |      |
|                       | Co <sub>Vs</sub> -MoS <sub>2</sub>     | 739                                  | 267 | 1068 |      |      |
| <b>PH pathway one</b> | Co <sub>hollow</sub> -MoS <sub>2</sub> | 604                                  | 183 | 233  | 777  |      |
|                       | Co <sub>Mo</sub> -MoS <sub>2</sub>     | 595                                  | 165 | 225  | 707  |      |
|                       | Co <sub>Vs</sub> -MoS <sub>2</sub>     | 739                                  | 757 | 242  | 732  |      |
| <b>PH pathway two</b> | Co <sub>hollow</sub> -MoS <sub>2</sub> | 604                                  | 183 | 334  | 987  |      |
|                       | Co <sub>Mo</sub> -MoS <sub>2</sub>     | 595                                  | 165 | 264  | 1165 |      |
|                       | Co <sub>Vs</sub> -MoS <sub>2</sub>     | 739                                  | 757 | 276  | 1080 |      |
| <b>FH pathway</b>     | Co <sub>hollow</sub> -MoS <sub>2</sub> | 604                                  | 183 | 1014 | 803  | 1018 |
|                       | Co <sub>Mo</sub> -MoS <sub>2</sub>     | 595                                  | 165 | 1298 | 1286 | 1069 |
|                       | Co <sub>Vs</sub> -MoS <sub>2</sub>     | 739                                  | 757 | 1258 | 877  | 1104 |

## References:

1. G. Liu, A. W. Robertson, M. M.-J. Li, W. C. H. Kuo, M. T. Darby, M. H. Muhieddine, Y.-C. Lin, K. Suenaga, M. Stamatakis, J. H. Warner, S. C. E. Tsang, *Nat. Chem.*, 2017, **9**, 810-816.
